# Supplementary material
Source: PubMed Central journal article supplement (PMC4029045)
Supplement: Supp_Fig1.pdf [file Supp_Fig1.pdf]

## Supplementary Data

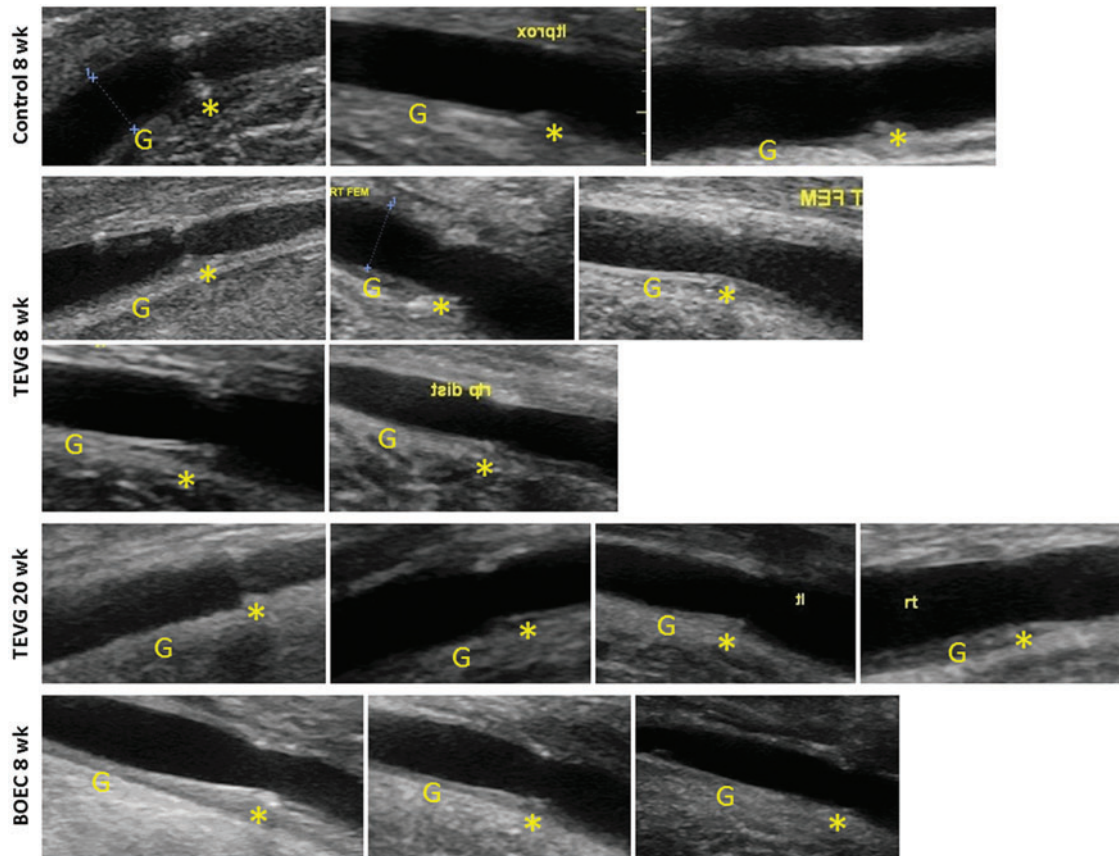

**SUPPLEMENTARY FIG. S1.** Composite images of ultrasounds conducted at 8 and 20 weeks. The top row contains ultrasound images of sham control vessels following 8 weeks of implantation in the femoral artery. The second and third rows contain ultrasound images from each animal acquired at 8 weeks following TEVG implantation. The fourth row contains the ultrasound images acquired at 20 weeks from each of the four grafts implanted for a total of 24 weeks. The bottom panel contains the ultrasound images acquired from blood outgrowth endothelial cell (BOEC)-seeded grafts at 8 weeks, immediately prior to removal of all anticoagulants and 1 week before explantation. Images show the distal end of the TEVG. The label “G” in each image indicates the location of the graft or sham and the symbol \* indicates the location of the distal anastomosis. TEVG, tissue-engineered vascular graft.
