# Supplementary material
Source: PubMed Central journal article supplement (PMC4029045)
Supplement: Supp_Fig2.pdf [file Supp_Fig2.pdf]

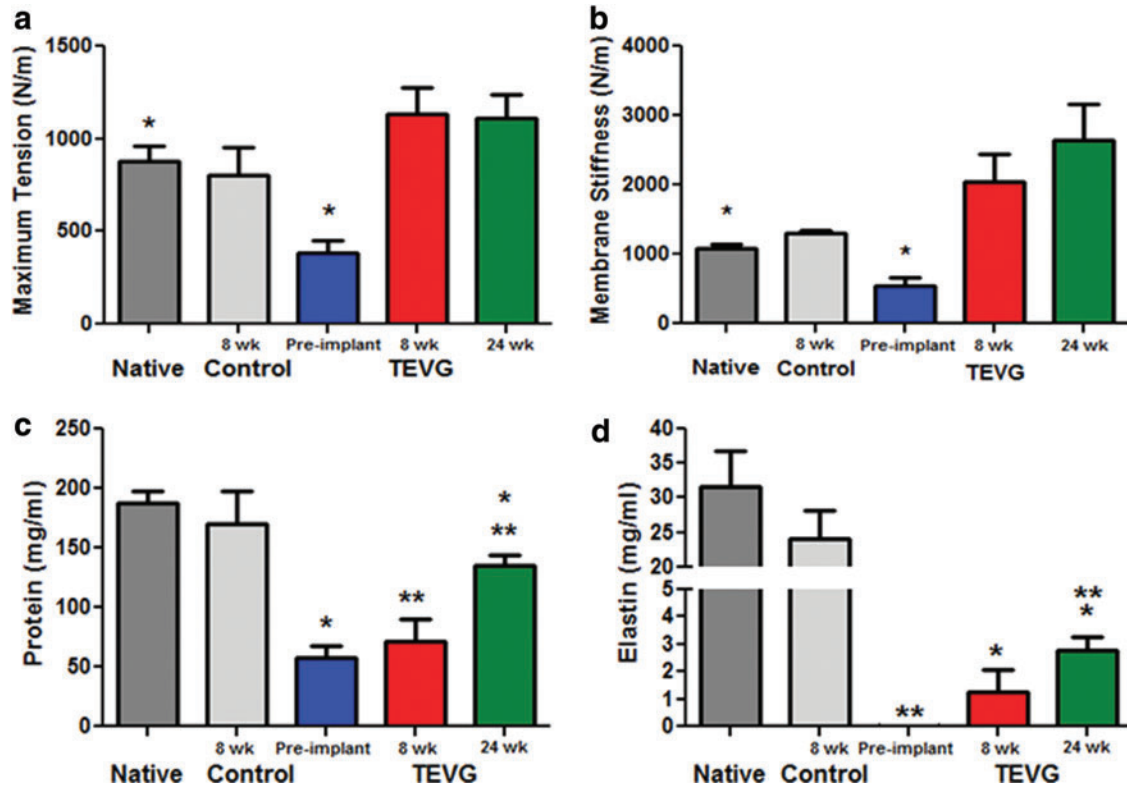

**SUPPLEMENTARY FIG. S2.** The TEVG properties (a) maximum tension, (b) membrane stiffness, (c) protein concentration, and (d) elastin concentration of explanted TEVG at 8 and 24 weeks in comparison to decellularized grafts (Preimplant), femoral artery (Native), and sham control (Control). Statistical differences at  $p < 0.05$  are shown with paired symbols.
