# Supplementary material
Source: PubMed Central journal article supplement (PMC4029045)
Supplement: Supp_Fig3.pdf [file Supp_Fig3.pdf]

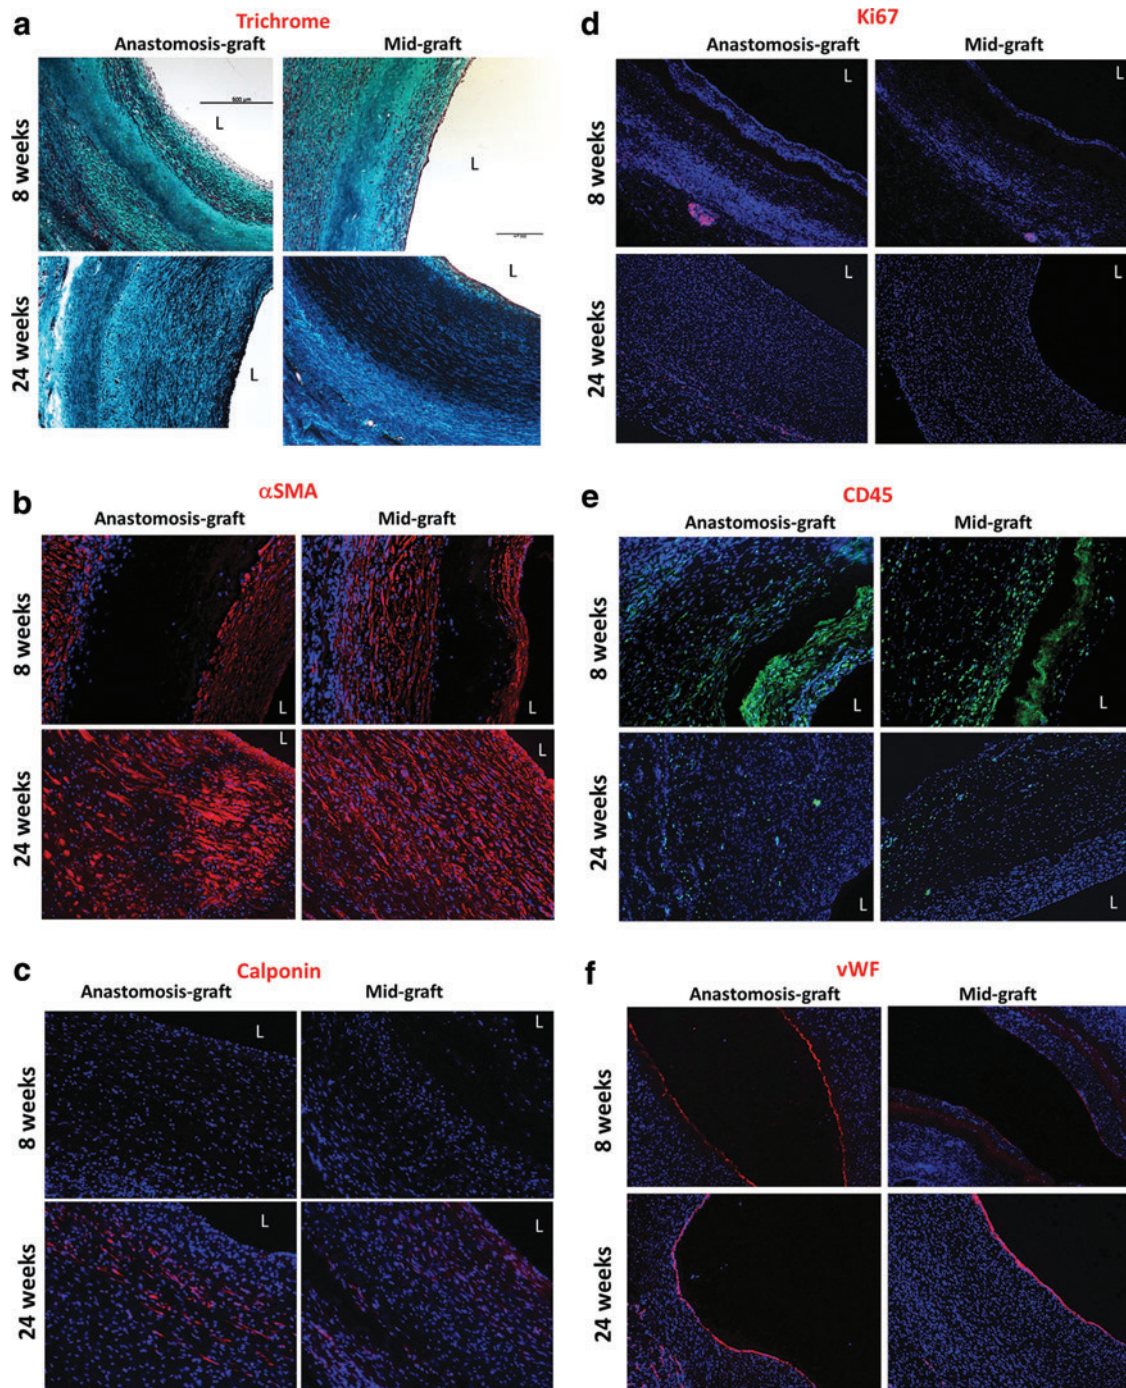

**SUPPLEMENTARY FIG. S3.** TEVG mid-graft and anastomosis cross-section staining at 8 and 24 weeks explant with (a) Trichrome, (b)  $\alpha$ SMA, (c) Calponin, (d) Ki67, (e) CD45, and (f) vWF. Lumen side indicated by 'L'.
